1        **Deficiency of *ZC3HCl* increases vascular smooth muscle cell migration, proliferation**  
2                                            **and neointima formation following injury**

3  
4 Redouane Aherrahrou (1,2)\*, Tobias Reinberger (1)\*, Julia Werner (4), Miriam Otto (1),  
5 Jaafar Al-Hasani (1), Maria Loreto Munoz-Venegas (1), Mete Civelek (2,3), Heribert  
6 Schunkert (4), Thorsten Kessler (4), Jeanette Erdmann (1)<sup>#</sup>, Zouhair Aherrahrou (1)<sup>#</sup>

7  
8                (1) Institute for Cardiogenetics, Universität zu Lübeck; DZHK (German Centre for  
9                Cardiovascular Research), Partner Site Hamburg/Kiel/Lübeck, Germany; University  
10                Heart Centre Lübeck, 23562 Lübeck, Germany

11                (2) Center for Public Health Genomics, University of Virginia, Charlottesville, VA,  
12                USA

13                (3) Department of Biomedical Engineering, University of Virginia, Charlottesville,  
14                VA, USA

15                (4) Deutsches Herzzentrum München, Technische Universität München and DZHK  
16                (German Centre for Cardiovascular Research); Partner Site Munich Heart Alliance,  
17                München, Germany

18  
19 Running title: *Zc3hc1* protects against neointima formation

20 \* / #: These authors contributed equally to this work

21 Corresponding author: Dr. Zouhair Aherrahrou

22 Institute for Cardiogenetics, Universität zu Lübeck, Ratzeburger Allee 160, 23562 Lübeck,  
23 Germany

24  
25 Tel: +49 451 3101 8310; Fax: +49 451 3101 8308; E-mail: [zouhair.aherrahrou@uni-](mailto:zouhair.aherrahrou@uni-luebeck.de)  
26 [luebeck.de](mailto:zouhair.aherrahrou@uni-luebeck.de)

32

33 **Abstract:**

34 The *ZC3HC1* gene is associated with various cardiovascular traits in that its common  
35 missense variant, rs11556924-T (p.Arg363His), lowers risk of coronary artery disease (CAD)  
36 and blood pressure, but increases carotid intima-media thickness (IMT). This study was  
37 designed to determine the mechanisms by which *ZC3HC1* modulates IMT using *in vitro* and  
38 *in vivo* models.

39

40 We assessed the effect of the rs11556924-T allele on *ZC3HC1* expression in vascular smooth  
41 muscle cells (SMCs) from 151 multi-ethnic heart transplant donors and found that  
42 rs11556924-T was significantly associated with lower *ZC3HC1* expression and faster SMC  
43 migration. These results were supported by *in vitro* silencing experiments. At the protein  
44 level, *ZC3HC1* deficiency resulted in the accumulation of cyclin B1, a key cell cycle protein.  
45 Further, transcriptome analysis revealed changes in the regulation of canonical SMC marker  
46 genes, including *ACTA2*, *CNN1*, *LMOD1*, and *TAGLN*. Pathway analysis of differentially  
47 expressed genes in SMCs secondary to *ZC3HC1* knockdown showed decreased expression of  
48 genes in the cell division and cytoskeleton organization pathways.

49

50 In line, primary SMCs isolated from the aortas of *Zc3hc1*<sup>-/-</sup> mice migrated faster and  
51 proliferated more compared to SMCs isolated from wild-type littermates, with the former also  
52 showing accumulation of cyclin B1. Neointima formation was also enhanced in *Zc3hc1*<sup>-/-</sup>  
53 mice in response to arterial injury mimicking restenosis.

54

55 Taken together, these findings demonstrate that genetic modulation or deficiency of  
56 *ZC3HC1* leads to the accumulation of cyclin B1 in SMCs and increased migration,  
57 proliferation, and injury-induced neointima formation. We further discuss and propose that a  
58 genetic variant regulating SMC proliferation may enhance IMT and early atherosclerosis  
59 progression but may be beneficial for plaque stability in advanced lesions.

60

61

62 **Key words:** *ZC3HC1*, NIPA, SMC migration and proliferation, neointima formation, *cyclin*  
63 *B1*.

64 **Introduction:** Coronary artery disease (CAD) caused by atherosclerosis is the leading cause  
65 of death in the developed world <sup>1</sup>. Due to atherosclerotic deposits, the lumen of the vessels  
66 becomes narrow, limiting the supply of oxygen-rich blood to the affected tissue. This  
67 reduction in blood flow may result clinically in the development of chest pain and, in the  
68 event of atherothrombosis or myocardial infarction (MI). Implantation of coronary stents is  
69 the primary therapeutic option to reopen an occluded coronary artery in MI patients. Despite  
70 the development of drug-eluting stents and balloons, restenosis due to neointima formation  
71 remains a major limitation after coronary intervention.

72 Genome-wide association studies (GWAS) have identified the single nucleotide  
73 polymorphism (SNP) rs11556924 at chromosome 7q32.2 CAD susceptibility locus, which  
74 harbors the *ZC3HCl* gene <sup>2-8</sup>. The CAD-associated variant rs11556924-T is a non-  
75 synonymous variant, leading to an amino acid substitution p.Arg363His in the canonical  
76 transcript of *ZC3HCl* and a ~4.9% to 7.0% reduction in CAD risk per allele <sup>4,6,9,10</sup>. However,  
77 the same genetic variant increases the risk of carotid intima-media thickness (IMT) in patients  
78 with rheumatoid arthritis <sup>11</sup>.

79 *ZC3HCl* encodes the nuclear-derived protein, nuclear interaction partner of anaplastic  
80 lymphoma kinase (NIPA)<sup>12</sup>, an essential component of the SCF-type E3 ubiquitin ligase  
81 complex that initiates the degradation of cyclin B1 <sup>7,13</sup>. Because cyclin B1 and cyclin-  
82 dependent kinase form the M-phase promoting factor, NIPA is involved in regulating the cell  
83 cycle at the G2 to M-phase transition <sup>13</sup>.

84 To understand the link between NIPA modulation and vascular remodeling, we assessed the  
85 role of *ZC3HCl* in human and murine vascular smooth muscle cells (SMCs), a key cell type  
86 involved in neointima formation following injury <sup>14</sup>. Specifically, we analyzed the effects of  
87 *ZC3HCl* on migration and proliferation of primary human and mouse aortic SMCs *in vitro*.  
88 Subsequently, we used wire injury to induce neointimal hyperplasia <sup>15</sup> *in vivo* in *Zc3hc1*-  
89 deficient mice. Our findings showed that *ZC3HCl* deficiency was accompanied by cyclin B1  
90 accumulation, increased migration and proliferation of vascular SMCs and enhanced  
91 neointima formation.

92

93

94

95 **Material and Methods**

96

97 ***Expression quantitative trait locus analysis of ZC3HC1 in human SMCs:*** The University of  
98 Virginia IRB has ruled that specimens used for cell collection do not fall under the purview of  
99 current regulations governing the participation of human subjects in research since these  
100 specimens have no identifying information. This study was approved by the Institutional  
101 Review Boards of UCLA and the University of Virginia.

102 Human aortic SMCs isolated from the ascending aortas of 151 heart transplant donors at  
103 UCLA or obtained from commercial suppliers (Lonza and PromoCell) as this has been  
104 previously described<sup>16</sup>. All SMCs were maintained in Smooth muscle cell Basal Medium  
105 (SmBM, CC-3181, Lonza) supplemented with Smooth muscle Medium-2 (SmGM-2, CC-  
106 4149, Lonza). Briefly, the stranded libraries of high-quality ribosomal RNA-depleted total  
107 RNA were sequenced to ~100 million read depth with 150 bp paired-end reads at the  
108 Psomogen sequencing facility. The reads with average Phred scores <20 were trimmed using  
109 Trim Galore, followed by mapping the reads to the hg38 version of the human reference  
110 genome using the STAR Aligner<sup>17</sup> in two-pass mode. Gene expression of *ZC3HC1* was  
111 quantified by calculating the number of transcripts per million (TPM) using RNA-SeQC<sup>18</sup>.  
112 Expression quantitative traits locus (eQTL) analysis was performed using tensorQTL<sup>19</sup> after  
113 correcting for sex, genotype PCs, and hidden confounding variables.

114

115 ***Quantification of migration in 151 primary SMCs:*** Cell migration assays were performed  
116 with the xCELLigence Biosensor System using specifically designed 16-well plates equipped  
117 with membranes having 8- $\mu$ m pores (CIM-plate 16; Roche Diagnostics). Cells in serum-free  
118 medium were seeded in the upper chambers, and the chemoattractant PDGF-BB (100 ng/mL)  
119 added to the lower chambers, with serum-free medium being the negative control. Cell  
120 migration was monitored over 24 h. Data were analyzed using RTCA software version 1.2  
121 (Acea Biosciences Inc., San Diego, CA) combined with R software. The association between  
122 the genotype of rs11556924 and migration was calculated using linear mixed model to  
123 account for multiethnic population composition as previously been described<sup>16</sup>.

124

125 ***Silencing of ZC3HC1 gene expression using siRNA:*** Dicer small interfering RNA (siRNA)  
126 targeting the *ZC3HC1* gene (*ZC3HC1* siRNA, IDT-ID: hs.Ri.ZC3HC1.13.2) and scramble  
127 control siRNA were purchased from Integrated DNA Technologies (IDT). Human aortic  
128 SMCs (Cell Applications, Inc., #354-05a, C/C genotype for rs11556924) in M231 cell culture

129 medium (Gibco) with Smooth Muscle Growth Supplement (SMGS) (Gibco) were cultured in  
130 48-well cell culture plates (Greiner bio-one) at a density of  $0.4 \times 10^5$  cells per well for 24 h.  
131 The cells were transfected with 5 nM *ZC3HC1* siRNA or 5 nM control siRNA overnight  
132 using GenMute™ SMC siRNA Transfection Reagent (SignaGen Laboratories) according to  
133 the manufacturer's instructions. The transfected cells were subsequently incubated in M231  
134 SMGS culture medium for 48 h, after which the samples were harvested and stored at  $-80^\circ\text{C}$   
135 until used for qPCR and Western blot analyses.

136

137 ***Cell migration and proliferation of ZC3HC1-KD SMCs:*** To determine the role of *ZC3HC1*  
138 gene expression knockdown in SMC migration, wound-healing assays with ibidi 4-well  
139 culture inserts in a 12-well plate format were performed as described<sup>20</sup>. Briefly,  
140 approximately  $2.2 \times 10^4$  SMCs (Cell Applications, Inc., #354-05a, C/C genotype for  
141 rs11556924) per well were seeded into insert wells and incubated at  $37^\circ\text{C}$  and 5%  $\text{CO}_2$  for 24  
142 h. Following siRNA transfection overnight (see above), the cells were incubated in M231  
143 culture medium supplemented with Smooth Muscle Differentiation Supplement (SMDS)  
144 (Gibco), which contains only 1% (v/v) fetal bovine serum (FBS) and 30  $\mu\text{g}/\text{mL}$  heparin. After  
145 48 h, the inserts were removed, and the cells were washed with phosphate buffered saline  
146 (PBS) and cultured in M231 SMDS medium supplemented with 5  $\text{ng}/\text{mL}$  PDGF-BB  
147 (Peprotech) to provoke cell migration. Images taken at 0 and 12 h with an Olympus IX70  
148 microscope were analyzed using an in-house Python script. In brief, images were converted  
149 into black-and-white images and optimized using the methods *GaussianBlur* and  
150 *adaptiveThreshold* in the OpenCV package *cv2*. The mean pixel distances were calculated  
151 relative to time 0. All experiments were performed in triplicate. To assess the proliferation of  
152 *ZC3HC1*-KD SMCs, the cells were plated into 96-well plates ( $0.6 \times 10^4$  cells/well) and  
153 transfected as described above. The next day, the cell culture medium was replaced by M231  
154 medium supplemented with 1% FBS to starve the cells. These human SMCs were  
155 subsequently treated with 100  $\text{ng}/\text{mL}$  PDGF-BB (Peprotech) to induce proliferation. To  
156 quantify the proliferation rate, the cell nuclei were stained with Hoechst 33342 dye  
157 (ThermoFisher Scientific) at several time points and the number counted using an in-house  
158 Python script *CellCounter.py*. Six wells were analyzed per condition, with all experiments  
159 performed in triplicate. The values were normalized to time point zero to account for small  
160 differences in initial cell numbers after siRNA transfection.

161

162 **qPCR analysis:** These analyses were performed as described <sup>21 22</sup>. Briefly, total RNA was  
163 isolated from cultured cells using RNeasy plus kits (Qiagen, Valencia, CA, USA) and reverse  
164 transcribed into cDNA. mRNA levels were determined by relative quantitative RT-PCR and  
165 analyzed using the  $\Delta\Delta$ CT method relative to the internal standard, GAPDH <sup>21</sup>. The primers  
166 (Eurofins Genomics) used in this study are shown in **Table 1**.

167  
168

**Table 1: Primer sequences used in qPCR reactions.**

| Gene          | Forward primer (5' - 3')       | Reverse primer (5' - 3')     | Expected fragment length (bp) |
|---------------|--------------------------------|------------------------------|-------------------------------|
| <i>ACTA2</i>  | <i>TAGAACATGGCATCATCACCA</i>   | <i>AGGGTGGGATGCTCTTCAG</i>   | 100                           |
| <i>CALDI</i>  | <i>GAGTCTCCAGTGTCTTGGC</i>     | <i>GCCCTGGTTAGCTCTTCTGG</i>  | 184                           |
| <i>CCNB1</i>  | <i>GCCAGAACCTGAGCCTGTTA</i>    | <i>CAGAGAAAGCCTGACACAGGT</i> | 131                           |
| <i>CNN1</i>   | <i>GTTGGCCTCAAAAATGTCGT</i>    | <i>AGGCTCCGTGAAGAAGATCA</i>  | 121                           |
| <i>GAPDH</i>  | <i>AGATTTGGTCGTATTGGG</i>      | <i>GGAAGATGGTGATGGGATT</i>   | 203                           |
| <i>LMOD1</i>  | <i>GCTCAACTTCTGTGAAAAGGAGA</i> | <i>TCTTGGCATCTGTCTTGGTCT</i> | 95                            |
| <i>TAGLN</i>  | <i>CACCAGCTTGCTCAGAATCA</i>    | <i>GTCCTTCCTATGGCATGAGC</i>  | 185                           |
| <i>TPM1</i>   | <i>TGAGAAGGCAGCAGATGAGA</i>    | <i>GTCGGCATCTTCAGCAATG</i>   | 130                           |
| <i>ZC3HC1</i> | <i>CTGGCCAGACAGCCCATC</i>      | <i>GAAGCTGGAGGTCCAAGTGA</i>  | 119                           |

169  
170

171 **Western blot analysis:** Western blot analyses were performed as described <sup>22</sup>. Briefly, 15  $\mu$ g  
172 samples of protein isolated from cultured cells were electrophoresed on SDS-PAGE gels and  
173 transblotted onto nitrocellulose membranes. The blots were treated with 5% skim milk and  
174 incubated with primary antibodies, including anti-NIPA (phospho S354) antibody (abcam  
175 ab63557), anti-cyclin B1 antibody (abcam ab181593) and anti-GAPDH antibody (loading  
176 control; abcam ab181602). The blots were subsequently incubated with the appropriate  
177 secondary antibodies. Protein bands were detected using the ECL Prime Western Blotting  
178 Detection Reagent (GE Health Care) and quantified using ImageLab software (Bio-Rad).

179

180 **RNA sequencing:** Human aortic SMCs (Cell Applications, Inc., #354-05a) were seeded into  
181 6-well plates at a density of  $3.1 \times 10^4$  cells/cm<sup>2</sup> and transfected with siRNA as described  
182 above. After 2 days in M231 SMDS medium, 5 ng/mL PDGF-BB (Peprotech) were added.  
183 Cells devoid of PDGF-BB served as an internal control. After incubation for 24 h, the RNA  
184 was extracted using innuPREP RNA Mini Kits 2.0 (Analytik Jena), yielding ~5  $\mu$ g total RNA  
185 (RIN>7) per sample. RNA sequencing (RNAseq), including ribosomal RNA-depletion and  
186 quality control, was performed at the Novogene sequencing facility (NovaSeq 6000 PE150,

187 150 bp paired-end reads). After trimming reads with low average Phred scores (<20) using  
188 Trim Galore, all included samples passed the quality control analysis. Reads were mapped to  
189 the hg38 version of the human reference genome using the STAR Aligner<sup>17</sup> in two-pass  
190 mode, with gene expression quantified by calculating TPM using RNA-SeQC<sup>18</sup>.

191  
192 **Differential gene expression and functional enrichment analysis:** A total of 17,242 genes  
193 with >6 reads were included in at least 20% of the samples in at least one of the two  
194 conditions (ZC3CH1 siRNA and control siRNA) for differential expression analysis using  
195 DESeq2 controlling for batch effect<sup>23</sup>. Genes were considered to be differentially expressed  
196 under treated and untreated conditions when  $p_{\text{adj}}$  was <0.05 and  $\log_2(\text{fold-change})$  was >0.5.  
197 Principal component analysis (PCA) was performed using R. PDGF-BB treatment was  
198 defined as a covariate. Network analysis and Gene Ontology (GO) enrichment after clustering  
199 were performed to characterize the functional consequences of differences in gene expression  
200 associated with downregulation and normal expression of *ZC3HC1*<sup>24</sup>. In brief, a functional  
201 gene network containing differentially expressed genes ( $p_{\text{adj}} < 0.05$ ) was constructed with the  
202 help of the STRING database repository (<https://string-db.org/>) using the REST API  
203 implemented in Python. The following parameters were used: species: 9606, network\_type:  
204 functional, network\_flavor: confidence, score>0.4, add\_white\_nodes: 30 for the complete  
205 gene network (**Supplementary Figure 2**) and 8 for the CCNB1 subnetwork (**Figure 3**).  
206 Agglomerative ward clustering of the gene network was performed using the *scikit-learn*  
207 (version 0.24.2) clustering package. Gene set enrichment of each cluster was performed using  
208 the REST API of STRING<sup>24</sup>. Gene networks were visualized by the Python packages  
209 *networkx* (V4.4.0) and *matplotlib* (V40.8.0).

210  
211 **Generation and housing of animals:** Heterozygous *Zc3hc1*<sup>(+/-)</sup> mice  
212 (*Zc3hc1*tm1a(KOMP)Wtsi, background: C57BL/6N) were obtained from KOMP at UC  
213 Davis, California. They were created using a targeting construct of the mouse *Zc3hc1* gene,  
214 designed by introducing the EN2 splicing acceptor (EN2 SA) followed by the beta-  
215 galactosidase sequence and a neomycin selection cassette 3' at exon 4. Heterozygous mice  
216 were initially backcrossed to a C57BL/6J genetic background for at least six generations and  
217 then used in Het × Het mating to generate sufficient numbers of *Zc3hc1* knockout (KO or <sup>-/-</sup>)  
218 and wild-type (WT or <sup>+/+</sup>) littermates for the experiments. Homozygous *Zc3hc1*<sup>(-/-)</sup> were  
219 found to be infertile. Mice were genotyped using PCR screenings of DNA samples isolated  
220 from ear biopsies. Mice were genotyped using the primers 5'-  
221 TTGACTGACAGAGGATGAGAGC-3' (forward) and 5'-GGGCCTTTAATCCCAACACT-



222 3' (reverse), targeting the second *LoxP* site located between exons five and six in the *Zc3hc1*  
223 gene. The expected lengths of the DNA fragments were 298 bp for the knockout and 260 bp  
224 for the WT mice (**Figure 4A, right**). In addition,  $\beta$ -gal-activity was measured in heart  
225 cryosections from one mouse per genotype (*Zc3hc1*<sup>+/+</sup>, or <sup>-/-</sup>) (**Supplementary Figure 3C**),  
226 as described<sup>25</sup>.

227

228 **Neointima formation mouse model:** All animal experiments were performed in accordance  
229 with the German animal studies committee of Upper Bavaria and under international  
230 guidelines. Wire injury was induced in 8- to 12-week-old female mice as described<sup>18</sup>. Briefly,  
231 all surgical procedures were performed under general anesthesia. Anesthesia was achieved by  
232 intraperitoneal (i.p.) injection of midazolam (5.0 mg/kg), medetomidine (0.5 mg/kg), and  
233 fentanyl (0.05 mg/kg) (MMF) in 300 $\mu$ l of 0.9% (w/v) sodium chloride. A half dosage of  
234 MMF was added if the inter-toe reflex was re-established or the duration of anesthesia  
235 exceeded 60 minutes. After a skin incision, the left femoral artery of each was exposed by  
236 blunt dissection and an angioplasty guidewire (0.015 inch in diameter, No. C-SF-15-15,  
237 COOK, Bloomington, IN) was introduced into the arterial lumen and inserted towards the  
238 iliac artery. To denude and dilate the femoral artery, the wire was left in place for 1 minute.  
239 The guidewire was then removed and the arteriotomy site ligated. Mice were sacrificed 14  
240 days later by i.p. injection of pentobarbital. To remove blood inside the femoral arteries, the  
241 mice were perfused via the left ventricle and over the descending aorta with PBS (pH= 7.4).  
242 Femoral arteries were harvested and fixed in 4% buffered paraformaldehyde overnight.

243

244 **Histology and morphology:** Paraffin-embedded femoral arteries were sectioned at 2- $\mu$ m  
245 intervals and stained with hematoxylin and eosin. For morphometric analysis, images were  
246 digitalized (Leica DFC450C camera) and serial sections in 50- $\mu$ m intervals of each artery  
247 were blindly analyzed using ImageJ software (NIH Image Software). Media thickness (M)  
248 and the area of neointima formation (NI) were quantified and neointima-to-media ratios  
249 (NI/M) were calculated. To count Ki-67 positive cells, sections of paraffin-embedded femoral  
250 arteries were de-paraffined through a series of decreasing concentrations of alcohol (3x xylol,  
251 2 $\times$  100% ethanol, 1 $\times$  96% ethanol, 1 $\times$  70% ethanol and deionized water). The slides were  
252 heated for 1.5 min in a microwave at 900 W and for 15 min at 90 W. For histochemistry, the  
253 slides were washed three time with PBS and unspecific binding was blocked by incubation  
254 with 5% (v/v) goat serum in PBS. Tissue slides were stained overnight at ambient temperature  
255 with anti-Ki-67 (1:100 in PBS, ThermoFisher Scientific, Clone:B56, #15898578) or anti-



256 ACTA2 (1:100 in PBS, Abcam ab5694) antibody, and primary antibodies were visualized  
257 using a horseradish peroxidase system (Santa Cruz, SC2004) and DAB staining solution  
258 (DAKO, #3468). Cell nuclei were stained using a hemotoxylin solution (Carl Roth, #T865.1).  
259 To fix the slides, they were treated with a series of increasing concentrations of alcohol (see  
260 above), followed by treatment with Cytoseal XYL (ThermoFisher Scientific #8312-4).

261

262 ***Isolation and culture of murine SMCs:*** Mouse aortic SMCs were isolated from the thoracic  
263 aortas of WT and KO ( $n=8-10$ ) as reported previously <sup>22</sup>. Briefly, the thoracic aortas were  
264 collected, and fat and connective tissues were removed. The samples were pre-digested with  
265 collagenase II and the adventitia was removed mechanically. Adventitia-free aortas were cut  
266 into small pieces and further digested with collagenase II with shaking for at least 6 h, until  
267 complete tissue dissociation. The isolated cells were pelleted and resuspended in culture  
268 medium (DMEM plus 10% FBS and 1% penicillin/streptomycin, Gibco). Cells were  
269 expanded and grown on surfaces coated with 0.1% (w/v) gelatin. To quantify the purity of the  
270 populations, the isolated cells were characterized by flow cytometry using the SMC-specific  
271 FITC-labeled anti- $\alpha$ -SMA antibody (Sigma, F3777) and an isotype control (mouse IgG2a-  
272 FITC, Sigma F6522), yielding >95% purity (**Supplementary Figure 4**).

273

274 ***Murine SMC migration and proliferation:*** The migration of murine aortic SMCs was  
275 assessed using the xCELLigence RTCA DP system as described above. Briefly, the electrode  
276 side of the membrane was coated with 0.1% gelatin. The bottom compartment of each well  
277 was filled with 165  $\mu$ L of culture medium or serum-free medium as a control, and the  
278 membrane compartment was mounted. The upper wells were filled with 50  $\mu$ L of serum-free  
279 medium and equilibrated for 1 h at 37 °C in an incubator. Cell concentrations were adjusted to  
280  $2.7 \times 10^4$  cells/mL per well. Data were recorded for 24 h. To quantify the proliferation of  
281 murine aortic SMCs, cells were seeded in 12-well plates to yield a confluency of ~30%. To  
282 make these results comparable to those of the proliferation assay for human SMCs transfected  
283 with siRNA, the cells were incubated for 1 day, with the timepoint 0 h defined as 24 h after  
284 seeding. At each given timepoint, the cells were washed once with 1 mL PBS and fixed with  
285 0.5 mL of 4% (v/v) paraformaldehyde (PFA) for 5 min. After removing the PFA, the cells  
286 were permeabilized with 0.5 mL Triton-X-100 for 10 min, washed with 1 mL PBS, and  
287 stained with 0.5 mL 4',6-diamidino-2-phenylindole, dihydrochloride (DAPI) solution for  
288 10 min in the dark. After acquiring images of 10 non-overlapping regions per well, both the  
289 cell number and average size of nuclei were determined using our in-house Python script

290 *CellCounter.py*. Proliferation assays were performed in triplicate. The results were  
291 normalized to time point zero for each condition and replicate.

292  
293 **Statistical Analysis:** All data are presented as the mean  $\pm$  standard deviation (SD), with two  
294 groups compared by unpaired Student's t-tests or Mann-Whitney U tests ( $n < 8$  or not  
295 normally distributed data). All statistical analyses were performed using R or Python libraries,  
296 with  $p < 0.05$  considered statistically significant.

297

## 298 **Results**

299

300 **Associations of the *ZC3H1* variant rs11556924-T with cardiovascular disease (CVD)-**  
301 **related phenotypes:** A hypothesis-free phenome scan was performed using the MR-Base  
302 PheWAS online tool<sup>26</sup> and the GWAS Catalog<sup>27</sup> to determine the associations of rs11556924  
303 variants with CVD-related phenotypes. As expected, a genome-wide significant association  
304 was observed between this SNP and cardiovascular-related traits, including hypertension and  
305 CAD (**Figure 1A, Supplementary Table 1**), with the rs11556924-T allele associated with  
306 reduced risk of these diseases. A suggestive association ( $p = 1.4 \times 10^{-5}$ ) was also observed  
307 between this SNP and mean carotid IMT in the MRC-IEU consortium data (**Supplementary**  
308 **Table 1**).

309

310 **The rs11556924-T SNP is associated with lower *ZC3H1* expression and higher**  
311 **migration in human SMCs:** To understand the role of the rs11556924 variant at the level of  
312 gene expression, an eQTL analysis was performed using SMCs of 151 human donors. This  
313 assay showed that the T allele was associated ( $p = 0.012$ ) with lower *ZC3H1* expression  
314 (**Figure 1B**). To our knowledge, there are no eQTLs in monocytes/macrophages<sup>28</sup> or aortic  
315 endothelial cells<sup>29</sup>, suggesting that the regulatory impact of rs11556924 in the *ZC3H1* locus  
316 is SMC specific. Therefore, we assessed the impact of this variant on SMC migration, a  
317 hallmark for vascular remodeling<sup>14</sup>. Cell migration assays were performed using 100 ng/mL  
318 PDGF-BB as a chemoattractant in serum-free media, as described previously<sup>16</sup>. SMCs  
319 carrying the rs11556924-T variant were found to migrate faster toward PDGF-BB than SMCs  
320 carrying the C allele (**Figure 1C**), also after adjusting for sex. This result suggests that the  
321 *ZC3H1* rs11556924 variant is independent of the traditional CAD risk factors, such as male  
322 sex<sup>30,31</sup>.

323

324 **Downregulation of *ZC3HC1* in human SMC increases migration and proliferation:** To  
325 further investigate how *ZC3HC1* modulation affects SMC migration, cells were transfected  
326 with siRNA against *ZC3HC1* (*ZC3HC1* siRNA; knockdown efficiency was ~70% 12 h after  
327 transfection (**Figure 1D**)) or control siRNA. Migration assays showed that transient siRNA  
328 mediated knockdown of *ZC3HC1* transcripts promoted cell migration (**Figure 1E-F**).  
329 Moreover, adding PDGF-BB was accompanied by lower expression of *ZC3HC1* in control  
330 SMCs (**Figure 1D**) and increased migration (**Figure 1E**) in both *ZC3HC1*-KD and control  
331 SMCs ( $p < 0.001$ ). However, a significant difference between *ZC3HC1*-KD and control SMCs  
332 was apparent in both the presence and absence of PDGF-BB. In addition, a lower level of  
333 *ZC3HC1* mRNA significantly enhanced the proliferation of SMCs at 72 h, but not at earlier  
334 time points. This finding was in agreement with the results from genotyped SMCs derived  
335 from 151 human donors<sup>16</sup>, in which no significant correlation was observed between the T  
336 allele and cell proliferation at 24 h.

337  
338 **Transcriptional profiling of *ZC3HC1* downregulation in human SMCs:** To determine the  
339 transcriptional profile of *ZC3HC1* downregulation, transcriptome analysis using RNA  
340 sequencing was performed in aortic SMCs in the presence or absence of 5 ng/mL PDGF-BB.  
341 After quality control and quantification, the number of expressed genes (defined as genes with  
342 more than six read counts in at least 20% of the samples) ranged from 16,880 under control  
343 conditions to 17,242 after treatment with PDGF-BB (**Supplementary Table 5**). PCA  
344 identified two distinct clusters of samples, corresponding to the cells cultured under the two  
345 conditions with endogenous *ZC3HC1* expression and *ZC3HC1* downregulation  
346 (**Supplementary Figure 1**). Further, 3,045 genes were differentially expressed ( $p_{\text{adj}} < 0.05$ ). Of  
347 these, 284 genes showed a  $\log_2(\text{fold-change [FC]})$  above 0.5 (median 0.68), and 179 genes  
348 were downregulated with  $\log_2(\text{FC}) < -0.5$  (median -0.67). The latter also include the canonical  
349 SMC markers *LMOD1*, *TPM1*, *CNN1*, *CALD1*, *ACTA2*, and *TAGLN* (**Figure 2A-B**).  
350 Downregulation of the expression of genes encoding SMC markers in response to *ZC3HC1*  
351 knockdown was confirmed by qPCR (**Figure 2C**).

352

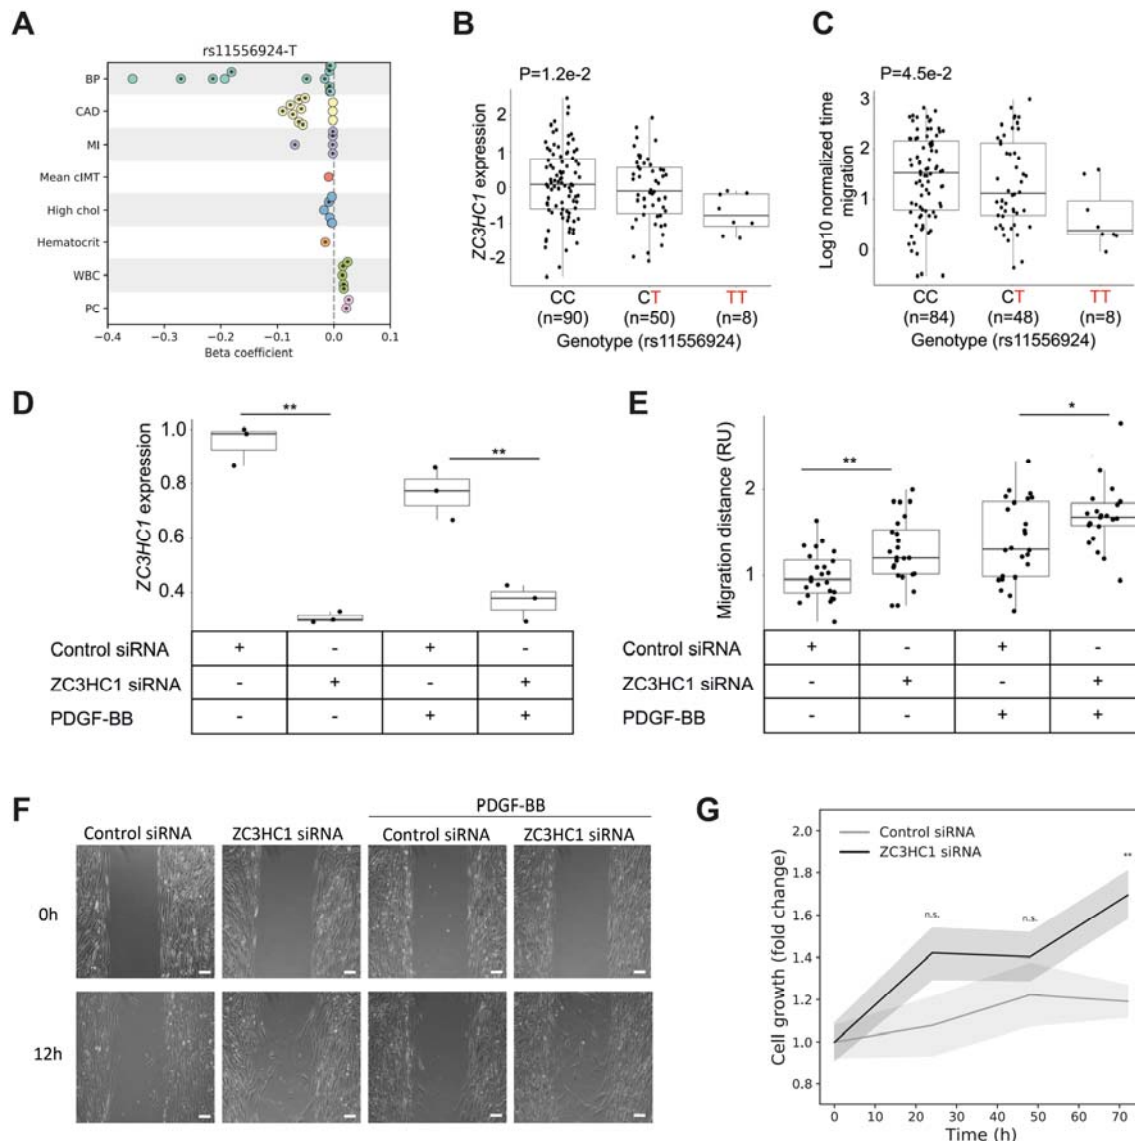

353

354 **Figure 1. Association of rs11556924 with cardiovascular diseases predominantly driven by vascular SMC**  
 355 **dysfunction, ZC3HC1 expression and vascular SMC migration.** **A)** Predominant association of rs11556924  
 356 with cardiovascular disease (CVD) driven by vascular SMC dysfunction. The plot shows the beta effect size of  
 357 the rs11556924-T allele derived from several genome-wide association studies (GWAS) categorized according  
 358 to eight CVD-related traits (BP, blood pressure; CAD, coronary artery disease; MI, myocardial infarction; cIMT,  
 359 carotid intima-media thickness; chol, cholesterol; WBC, white blood cell count; PC, platelet count). Asterisks  
 360 indicate genome-wide significance ( $p < 5 \times 10^{-8}$ ); data points without asterisks represent genome-wide  
 361 associations with suggestive significance ( $p < 5 \times 10^{-5}$ ). Negative effect size indicates that the risk allele (T)  
 362 of the single nucleotide polymorphism, rs11556924, is associated with a lower risk for several traits, including blood  
 363 pressure or coronary artery disease. **B)** The risk allele (T) of rs11556924 is associated with lower ZC3HC1  
 364 expression and **C)** faster migration by vascular SMCs. SMCs transfected with siRNA against ZC3HC1 showed  
 365 significant **D)** ZC3HC1 downregulation and **E)** increased migration in the presence or absence of PDGF-BB  
 366 (n=3, eight images per replicate). **F)** Representative images of the migration of SMCs transfected with ZC3HC1  
 367 siRNA and control siRNA (scale bars, 100  $\mu$ m). **G)** Knockdown of ZC3HC1 resulted in significant increases in  
 368 cell proliferation in the presence of PDGF-BB. Values are shown as means. The translucent error bands  
 369 represent s.d. \*  $p < 0.05$ ; \*\*  $p < 0.01$ ; n.s., not significant. Data in **B**, **C**, and **E** were analyzed using unpaired  
 370 Student's t test. Others were analyzed using Mann-Whitney U test.

371

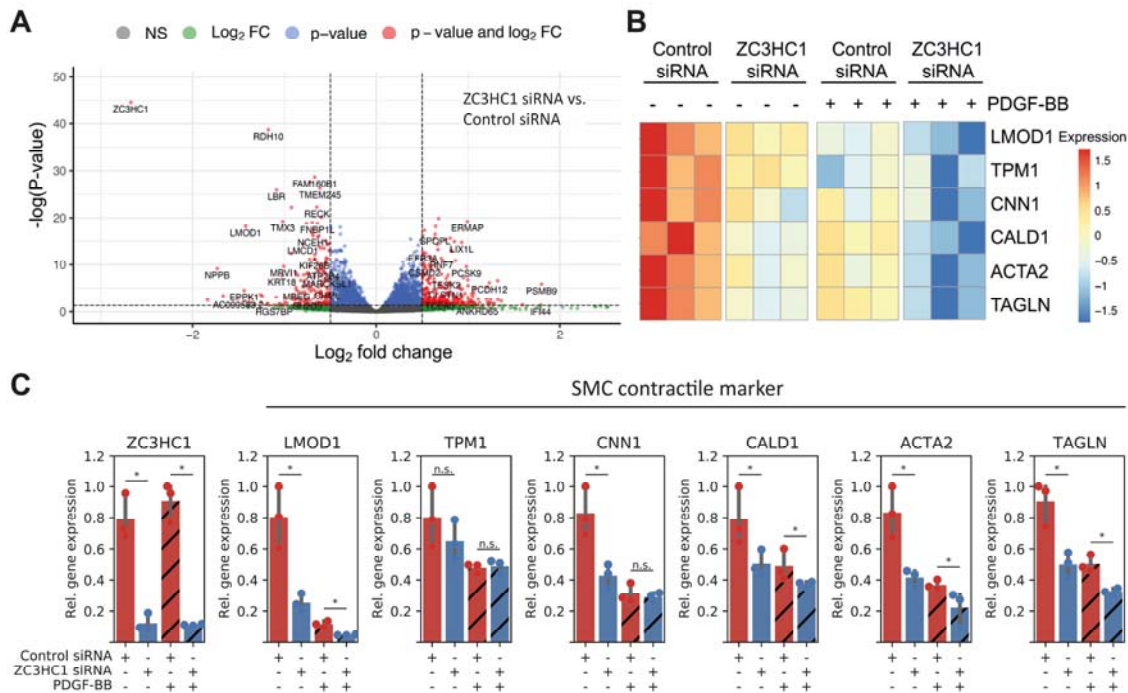

372

373

374

375

376

377

378

379

380

381

382

383

**Figure 2. Transcription profiling of human SMC after *ZC3HC1* downregulation.** **A**) Volcano plot of the expression profiles of differentially expressed genes in SMCs transfected with siRNA against *ZC3HC1* (*ZC3HC1* siRNA) (n=4) and control siRNA (n=5). The red data points represent the differentially expressed genes with statistical significance, whereas the gray data points indicate genes without disturbed gene expression. The vertical dashed lines correspond to a 0.5-fold-change in gene expression (up or down), and the horizontal dashed line represents the adjusted p-value for each gene. **B**) Heat map showing contractile SMC marker genes that were differentially expressed upon knockdown of *ZC3HC1* (from the same batch) in the presence or absence of PDGF-BB. **C**) qPCR validation of the expression of the contractile SMC marker genes. Values are shown as mean  $\pm$  s.d.; \* p<0.05; n.s., not significant. Data in **C** were analyzed using Mann-Whitney U test.

384

### Network analysis of differentially expressed genes

385

386

387

388

389

390

391

392

393

394

395

396

397

Subsequent network analysis of differentially expressed genes ( $p_{adj}<0.05$  and  $abs(\log_2(FC))>0.4$ ) using the STRING database<sup>24</sup> revealed that the *CCNB1* gene encoding cyclin B1 is a central hub for a variety of gene clusters (**Figure 3A-B, Supplementary Figure 2 and Supplementary Table 6-8**), whereas *ZC3HC1* interacted only with *CCNB1* (STRING score=0.607). Therefore, network analysis indicated that modulation of *ZC3HC1*/NIPA predominantly induces transcriptional changes through cyclin B1. Additional enrichment analysis of gene clusters highlighted several biological processes that were apparently modulated by the knockdown of *ZC3HC1*, including protein ubiquitination, muscle contraction/ cytoskeleton organization, and cell division (**Figure 3B**). To test whether *CCNB1* is modulated by lower levels of *ZC3HC1* in SMCs, we performed co-expression and Western blot analyses. Analysis of gene expression in aortic SMCs of 151 individuals showed a positive correlation ( $R=0.59$ ;  $p=1.4 \times 10^{-15}$ ) between *ZC3HC1* and *CCNB1* at the RNA level (**Figure 3C, top panel**). Similarly, qPCR showed that siRNA mediated *ZC3HC1*



398 downregulation reduced *CCNB1* expression in SMCs (**Figure 3C**, top right). At the protein  
 399 level, however, a lack of NIPA resulted in the intracellular accumulation of cyclin B1 (**Figure**  
 400 **3C** bottom panel), as previously described<sup>13</sup>.

401

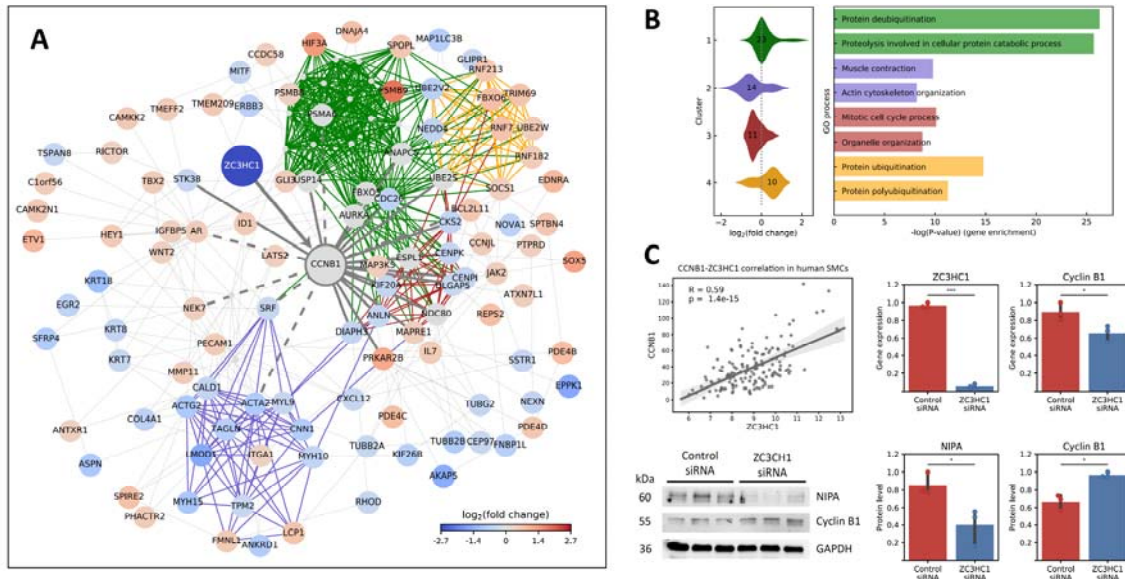

402  
 403

404 **Figure 3. Gene interaction network of *ZC3HC1/CCNB1* in SMCs and accumulation of cyclin B1 by**  
 405 ***ZC3HC1* knockdown. A)** Effect of *ZC3HC1* knockdown on the cyclin B1 (*CCNB1*) subnetwork of  
 406 differentially expressed genes (adjusted p-value <0.05 and abs(log<sub>2</sub>(fold-change))>0.4) derived from the  
 407 STRING database. The edges represent the combined STRING scores (>0.4, median=0.9) derived from co-  
 408 expression, experimental, database, and text mining scores. The complete gene interaction network is shown in  
 409 **Supplementary Figure 2**. The fold changes in gene expression on the log<sub>2</sub>-scale are depicted by red and blue  
 410 spheres. Gray spheres indicate genes not differing in expression but interacting with *CCNB1* or neighboring  
 411 genes according to the STRING database. Gray bold lines indicate direct interactions with *CCNB1* with medium  
 412 to high confidence (scores >0.5), and dashed lines indicate direct interactions with lower confidence (score=0.4–  
 413 0.5). Colored lines represent gene clusters. **B)** Distribution of log<sub>2</sub>(fold changes) in gene expression for each  
 414 cluster and enriched biological processes derived from Gene Ontology. Numbers in the violin plot indicate the  
 415 number of genes in the cluster. **C)** Co-expression analysis in 151 human aortic SMC preparations showed a  
 416 positive correlation between *ZC3HC1* and *CCNB1* gene expression, which was confirmed by transient  
 417 knockdown of *ZC3HC1* and qPCR (right top corner). By contrast, Western blot showing that *ZC3HC1*  
 418 knockdown results in the accumulation of cyclin B1 protein in SMCs. Values of bar plots are shown as  
 419 mean ± s.d.; \* p<0.05; \*\*\* p<0.001. Data in C were analyzed using Mann-Whitney U test.

420

421 **Phenotyping of *Zc3hc1*<sup>-/-</sup> mice:** The murine homolog of the human *ZC3HC1* gene is  
 422 ubiquitously expressed in a variety of tissues (**Supplementary Fig 3A-B**). X-Gal staining  
 423 confirmed that transgenic mice harbored the *LacZ* gene (**Supplementary Fig 3C**) with similar  
 424 results observed at the DNA level using agarose gel electrophoresis for *LoxP* sites (**Figure**  
 425 **4A**). Phenotypically, the birth rate was lower for *Zc3hc1*<sup>-/-</sup> than for WT and heterozygous  
 426 animals. To quantify the birth rate, the genotype frequencies were calculated for all genotyped  
 427 offspring from the mating of *Zc3hc1*-Het mice. The genotype frequencies for *Zc3hc1*<sup>-/-</sup>, WT  
 428 and Het mice were 10%, 29%, and 61%, respectively. In addition, knockout of *Zc3hc1* had a  
 429 significant impact on body weight (Figure 4B, left), with lifetime body weight being

430 significantly lower for *Zc3hc1*<sup>-/-</sup> than for WT (23±2g vs. 27±5 g; p<0.0001 at 44 weeks)  
 431 (**Supplementary Figure 3D**). In addition, a few *Zc3hc1*<sup>-/-</sup> mice exhibited shorter snouts than  
 432 their WT littermates (**Figure 4 B**, right). Despite the effect of *Zc3hc1* knockout on body  
 433 weight, life span was similar in *Zc3hc1*<sup>-/-</sup> and WT mice (**Figure 4B**, bottom).

434

435 **NIPA deficiency leads to increase neointima formation as a response to injury in mice:**

436 Because of the effects of *ZC3HC1* on the *in vitro* migration and proliferation of human SMCs,  
 437 the role of *Zc3hc1* on neointima formation was assessed *in vivo* using vascular injury model.  
 438 Neointima formation was induced in *Zc3hc1*<sup>-/-</sup> and WT mice by wire injury of the femoral  
 439 artery, and the extent of neointima formation was assessed after 14 days. Neointima formation  
 440 was approximately 2-fold greater in KO than in WT mice (p=0.005), accompanied by an  
 441 increase in intima-to-media ratio (p=0.003) (**Figure 4C**). The number of Ki-67 positive cells  
 442 in the neointima was also significantly greater in KO than in WT mice (21±14 vs. 2±2;  
 443 p=0.016), with a trend towards more ACTA2 positive cells in KO mice (p=0.087)  
 444 (**Supplementary Figure 3E-F**). These findings indicate that vascular remodeling after injury  
 445 is, in part, driven by the proliferation of vascular SMCs.

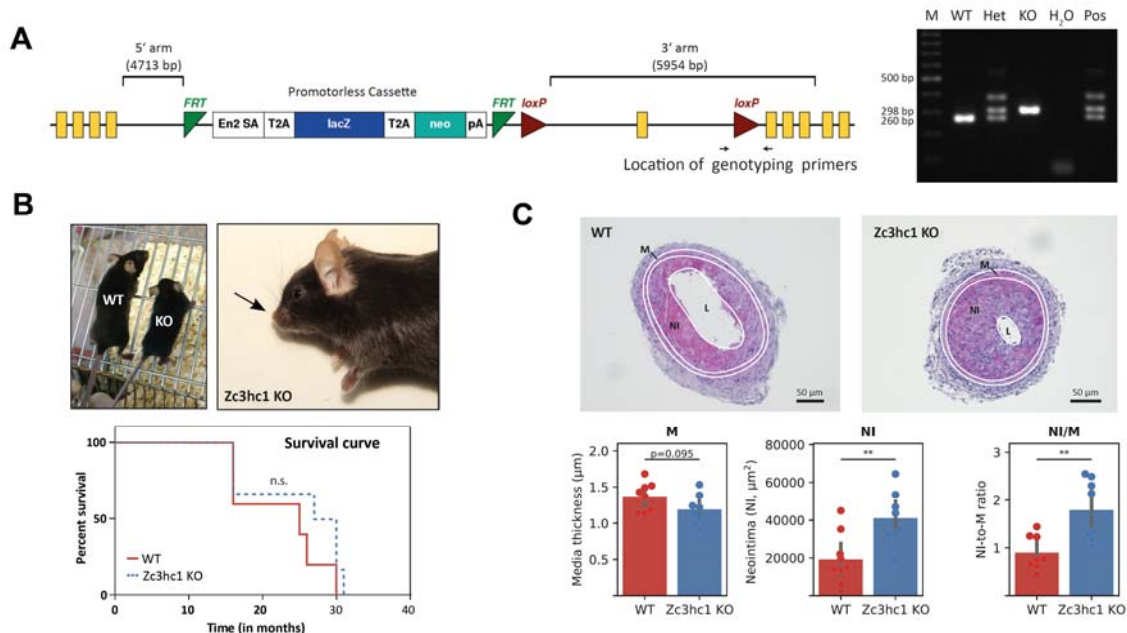

446

447 **Figure 4. Generation and characteristics of *Zc3hc1*<sup>-/-</sup> (KO) mice.** **A**) Targeting vector used to generate  
 448 *Zc3hc1*<sup>-/-</sup> mice (left) and genotyping of mice by PCR (right) (M: 100 bp marker, Wild-type mice (WT or  
 449 *Zc3hc1*<sup>+/+</sup>); Het: Heterozygous mice (*Zc3hc1*<sup>+/-</sup>); *Zc3hc1* knockout mice (KO or *Zc3hc1*<sup>-/-</sup>); H<sub>2</sub>O; Pos: Positive  
 450 control represented by Het mice (*Zc3hc1*<sup>+/-</sup>). Location of genotyping primers. Primer pair targeting the intron  
 451 between exons 5 and 6 of *Zc3hc1*, which contains a loxP site (left panel) in the targeted allele. The sizes of the  
 452 PCR products were 298 bp in KO (*Zc3hc1*<sup>-/-</sup>) and 260 bp in WT (*Zc3hc1*<sup>+/+</sup>) mice, with Het mice (*Zc3hc1*<sup>+/-</sup>)  
 453 possessing both alleles. **B**) Decreased body weight (left) and abnormally short snout (indicated by arrow) (right)  
 454 in KO mice. Survival curve showing no statistically significant difference between KO (n=6) and WT (n=5)  
 455 mice. **C**) Representative hematoxylin & eosin stained femoral artery sections (top), and quantification of media  
 456 thickness (M), area of neointima formation (NI) and neointima-to-media ratios (NI/M) (bottom) in WT (n=8)



457 and KO (n=8) mice. Scale bars, 50  $\mu$ m. Values of the bar plots are shown as mean  $\pm$  s.d.; \*\* p<0.01; n.s., not  
458 significant. Data were analyzed using Mann-Whitney U test.

459

460 **Complete lack of NIPA in mouse SMCs increases migration and proliferation:** Based on  
461 the findings from human SMCs, we isolated primary aortic mouse SMCs and tested whether  
462 NIPA deficiency in murine primary aortic SMCs promotes migration and proliferation.  
463 Compared with WT SMCs, the migration of *Zc3hc1*<sup>-/-</sup> SMCs was significantly enhanced at  
464 12 h (p=0.04), but not at later time points (**Figure 5A**). Furthermore, the proliferation of  
465 *Zc3hc1*<sup>-/-</sup> SMCs was significantly greater than that of WT SMCs after 24 h (**Figure 5B**), and  
466 the sizes of the nuclei significantly smaller in *Zc3hc1*<sup>-/-</sup> than in WT SMC (**Figure 5 B**,  
467 bottom). These findings suggest that the lack of NIPA promotes SMC migration during the  
468 first few hours, with proliferation occurring later.

469

470 **Knockout of *Zc3hc1* leads to cyclin B1 accumulation in mouse SMC:** Because NIPA has  
471 been shown to interact with cyclin B1<sup>13</sup>, we compared the expression of Cyclin B1 protein in  
472 NIPA-deficient and WT murine SMCs. Western blot analysis confirmed that NIPA-deficient  
473 mice lacked *Zc3hc1* encoding protein NIPA (**Figure 5C**, top) leading to a significantly greater  
474 accumulation of cyclin B1 in *Zc3hc1*<sup>-/-</sup> than in WT SMCs (p=0.006) (**Figure 5C**, bottom).

475

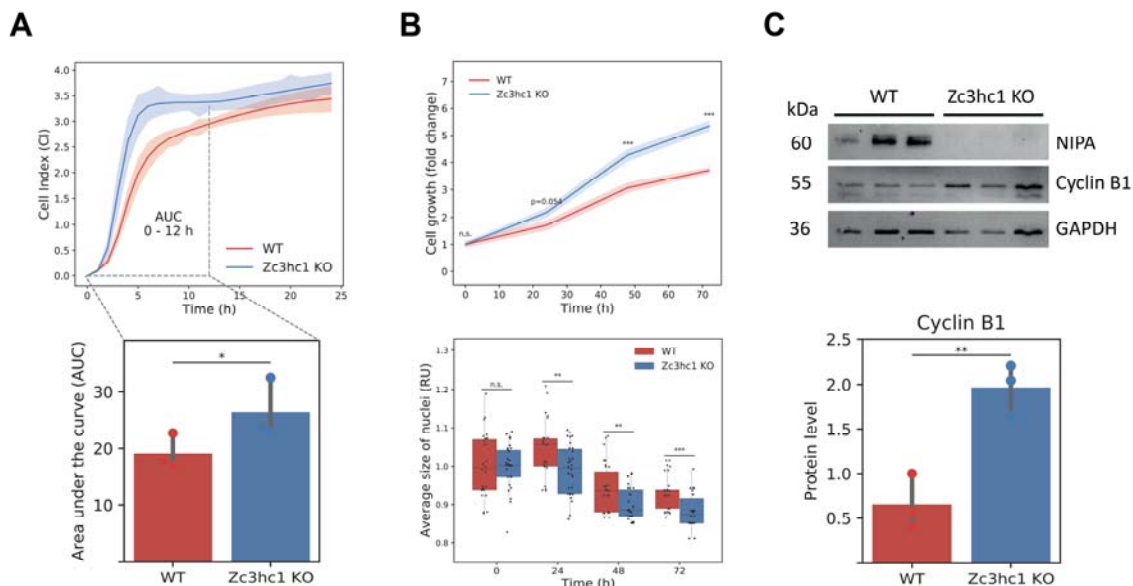

476

477 **Figure 5. Knockout (KO) of *Zc3hc1* in murine aortic SMCs.** SMCs isolated from *Zc3hc1*<sup>-/-</sup> mice show  
478 elevated migration (**A**) and proliferation (**B**) compared with SMCs isolated from wild-type (WT) mice. **C**  
479 Western blotting of NIPA confirming the knockout of *Zc3hc1* in SMCs, resulting in accumulation of cyclin B1  
480 protein. Values of bar plots are shown as mean  $\pm$  s.d.; \* p<0.05; \*\* p<0.01; \*\*\* p<0.001. Data were analyzed  
481 using unpaired Student's t test (**B**) or using Mann-Whitney U test (**A** and **C**).

482 **Discussion:**

483 Restenosis is one of the main clinical complications in patients who undergo coronary  
484 artery revascularization<sup>32,33</sup>. SMCs not only regulate the arterial contractile tonus and blood  
485 pressure but also constitute the key cell type during atherosclerotic plaque formation and in  
486 response to revascularization procedures<sup>34–36</sup>. SMCs migrate from the media into the intima  
487 of the vessels, followed by alterations in their phenotype in response to their new  
488 microenvironment<sup>34–36</sup>. This study assessed the role of *ZC3HCl* on the migration,  
489 proliferation and neointima formation of SMCs.

490 The ubiquitously expressed *ZC3HCl* gene encodes the cell cycle protein NIPA, which  
491 has been found first to be associated with CAD in several independent GWASs<sup>2–8</sup>. The CAD-  
492 associated rs11556924-C/T SNP in *ZC3HCl* is functional, leading to an amino acid change  
493 from arginine to histidine (p.Arg363His)<sup>4,7,9</sup>. Analysis of the publicly available GTEx dataset  
494 eQTL (V8) showed that the genetic variant rs11556924-T results in reduced *ZC3HCl* gene  
495 expression in heart (atrial appendage and left ventricle) and skin samples. Because eQTL  
496 effects are often cell type specific, we tested whether an eQTL was present in aortic SMCs  
497 from 151 heart transplant donors<sup>16</sup>, finding that SMCs from donors carrying the rs11556924-  
498 T allele have lower *ZC3HCl* expression and migrate faster than SMCs from donors carrying  
499 the rs11556924-C allele. The absence of a significant association between *ZC3HCl*  
500 expression and rs11556924 in blood samples<sup>9</sup>, monocytes/macrophages<sup>28</sup> and aortic  
501 endothelial cells<sup>29</sup> suggests that the regulatory impact of the variant at the *ZC3HCl* locus is  
502 specific to SMCs.

503 siRNA mediated knockdown (KD) of *ZC3HCl* in a commercially available human  
504 SMC line resulted in increased cell migration during the first 12 h compared with controls. In  
505 addition, PDGF-induced proliferation of *ZC3HCl*-KD SMCs was greater than that of control  
506 SMCs at 72 h, but not at earlier time points (24–48 h). This may explain the lack of a  
507 significant correlation between the rs11556924-T allele and cell proliferation in our study at  
508 24 h. The results obtained with *ZC3HCl*-KD SMCs are contrary to findings showing that  
509 siRNA mediated knockdown of NIPA impaired HeLa cell proliferation<sup>9</sup>. This discrepancy  
510 may be explained by differences in cell types and differences in proliferation assays, in that  
511 the earlier study measured metabolic activity (WST-1 reagent) rather than counting cells.

512 To assess the molecular mechanisms involved in *ZC3HCl* modulation, we performed  
513 transcriptome analysis, followed by analyses of gene–protein interaction networks and  
514 pathway enrichment *in vitro*. The increased migration and proliferation of *ZC3HCl*-KD  
515 SMCs was partly due to the transition of SMCs from a contractile/quiescent phenotype to a

516 synthetic/proliferative phenotype<sup>34-37</sup>. This was reflected in part by the downregulation of  
517 expression of mRNAs encoding canonical SMC contractile marker genes such as *alpha-*  
518 *smooth muscle actin (ACTA2)*, *calponin (CNN1)*, *transgelin (TAGLN)*, and *leiomodulin 1*  
519 (*LMOD1*)<sup>34-38</sup>. In addition to these changes in SMC contractile marker genes, our pathway  
520 analysis revealed that protein ubiquitination and mitotic cell cycle processes were affected by  
521 the knockdown of *ZC3HC1*, presumably through *CCNBI/cyclin B1*. The protein cyclin B1 is  
522 a key component in the control of cell cycle progression<sup>13</sup> and was found to be a key  
523 regulatory hub in our gene interaction network. Downregulation of *ZC3HC1* or its protein  
524 NIPA in human primary SMCs led to the accumulation of cyclin B1 protein, in agreement  
525 with previous findings<sup>7,13</sup>. For example, the effect of the *ZC3HC1* missense variant  
526 p.Arg363His (rs11556924-T) on proliferation and mitotic progression was assessed using a  
527 genome-editing approach in the pseudo-diploid colon carcinoma cell line DLD-1<sup>7</sup>. The  
528 change in amino acid was found to alter cyclin B1 dynamics, presumably resulting from  
529 enhanced NIPA phosphorylation at Ser395 in cells carrying the T allele. Interestingly,  
530 phosphorylated NIPA is degraded during late mitosis<sup>39</sup> and phosphorylation of NIPA  
531 abrogates the ability of NIPA to form the CSF<sup>NIPA</sup> complex and to ubiquitinate cyclin B1<sup>13</sup>.  
532 The lack of cyclin B1 ubiquitination accelerates its nuclear accumulation, reducing the time  
533 required to complete mitosis<sup>7</sup>. Taken together, these findings indicate that the effect of cyclin  
534 B1 on the cell cycle in SMCs may be tightly linked to both enhanced NIPA phosphorylation  
535 and decreased level of NIPA protein mediated by the missense variant rs11556924-T (**Figure**  
536 **6**).

537 The exact regulatory mechanisms by which NIPA/cyclin B1 regulates gene expression  
538 and cellular signaling remain unclear, in particular the roles of SMC contractile marker genes  
539 and genes/proteins involved in cell adhesion, the extracellular matrix and cytokine mediated  
540 signaling. Many genes involved in protein ubiquitination (e.g., *FBX06*, *RNF7*, *RNF213*, and  
541 *RNF182*) and proteasome complex formation (e.g., *PSMB8* and *PSMB9*) are upregulated in  
542 *ZC3HC1*-KD SMCs, probably to compensate for the deficiency of NIPA. For example,  
543 *FBX06* is a component of the SCF-type E3 ubiquitin ligase complex<sup>40</sup> and SCF complexes  
544 have been found to control cell proliferation through ubiquitin mediated degradation of  
545 critical regulators, including cell cycle proteins (e.g., cyclins) or transcription factors (e.g.,  $\beta$ -  
546 catenin)<sup>41</sup>. Therefore, NIPA deficiency leading to an increased expression of genes involved  
547 in protein ubiquitination may trigger an orchestrated gene regulation accompanied by an  
548 ubiquitin mediated degradation of specific transcription factors such as serum response factor  
549 (SRF). The transcription factor SRF ( $\log_2(\text{FC})=-0.41$ ;  $p_{\text{adj}}=1.96 \times 10^{-5}$ ) targets about one

550 quarter of differentially expressed genes, including *ZC3HCl* itself, *CCNBI*, and all canonical  
551 SMC contractile marker genes<sup>42,43</sup>. Among these SRF target genes, *ANLN* (encoding anillin  
552 actin binding protein), which is co-expressed with *CCNBI* (STRING score=0.891; see **Figure**  
553 **3A**, cluster 3), plays a role in regulating actin cytoskeletal dynamics, cell migration,  
554 cytokines, and bleb assembly during mitosis<sup>44,45</sup>.

555 As *ZC3HCl*-KD induced transcriptional changes are rather small, with only 60 genes  
556 being up- or downregulated  $\geq 2$ -fold, many of its effects may take place at the protein level,  
557 e.g., due to cyclin B1 accumulation. For example, the CDK1-cyclin B1 complex  
558 phosphorylates the protein Mcl-1, a regulator of apoptosis, thereby inducing its degradation  
559<sup>46</sup>. Cyclin B1 also interacts with the diaphanous related formin 3 protein, encoded by  
560 *DIAPH3*<sup>47</sup> (STRING score=0.959; see **Figure 3A**, cluster 3), which is required for  
561 cytokinesis, stress fiber formation, and transcriptional activation of SRF  
562 (UniProt/Q9NSV4<sup>48,49</sup>). Similar to Mcl-1, CDK1-cyclin B1 may also phosphorylate the  
563 *DIAPH3* protein, leading to its degradation. Taken together, these findings suggest that  
564 *ZC3HCl/CCNBI* modulation initiates various steps involving protein ubiquitination and  
565 degradation of specific factors that normally maintain the contractile phenotype in human  
566 SMCs (**Figure 6**).

567 To determine whether these *in vitro* findings could be extended to an *in vivo* model,  
568 we investigated the effects of complete NIPA KO on vascular remodeling in a mouse model.  
569 Similar to human SMCs, SMCs from these mice migrated and proliferated more and had  
570 increased cyclin B1 levels compared with SMCs derived from their WT littermates. The  
571 increased migratory/proliferative activity of murine SMC due to an accumulation of cyclin B1  
572 may explain the greater degree of injury-induced neointima formation in *Zc3hc1*<sup>-/-</sup> compared  
573 to WT mice. This finding is also in agreement with results demonstrating that increased level  
574 of cyclin B1 is associated with enhanced neointima formation<sup>50</sup> and that inhibition of this  
575 increase protects against neointima formation<sup>51</sup>. Because only female mice were included in  
576 our study, we cannot rule out any sex bias. However, we did not see any sex-stratified effects  
577 in our human dataset or in datasets from the UK Biobank (**Supplementary Table 2**).  
578 Moreover, male human *ZC3HCl*-KD SMCs behaved similarly to female murine *Zc3hc1*<sup>-/-</sup>  
579 SMCs, suggesting that the impact of NIPA modulation is independent of sex.

580  
581 Finally, it remains elusive why the T allele in *ZC3HCl* lowers the risk of CAD<sup>4,6,9,10</sup>,  
582 but increases the risk of carotid IMT as demonstrated recently in 502 patients with  
583 rheumatoid arthritis<sup>11</sup>. One reason could be the bivalent role of vascular SMCs as their

584 biological function in atherosclerosis have opposite effects depending on the stage of the  
585 lesions (early vs. advanced stage). At early stages of the formation of atherosclerotic lesions,  
586 migratory and proliferative SMCs are known to play a detrimental role in atherosclerosis<sup>34,52–</sup>  
587<sup>54</sup>. Therefore, anti-proliferative therapies were previously proposed for atherosclerosis<sup>55,56</sup>. In  
588 contrary, the role of SMCs in advanced lesions is thought to be beneficial by stabilizing the  
589 plaque, which may result in an asymptomatic progression of atherosclerosis. Interestingly,  
590 two working groups observed that SMCs derived from advanced plaques are less  
591 proliferative. Consequently they assumed that enhancement and not inhibition of SMC  
592 proliferation may be beneficial for plaque stability in advanced lesions<sup>54,56</sup>, thereby reducing  
593 the risk of major adverse cardiovascular event outcomes such as MI. Moreover, the T allele  
594 also lowers the risk for blood pressure (**Figure 1A**) that is a major risk factor CAD<sup>30,31</sup>,  
595 probably due to its impact on NIPA gene expression/phosphorylation and SMC contractile  
596 genes.

597

598 Taken together, our integrative analyses highlighted the functional role of *ZC3HC1* as  
599 a neointima formation-associated gene (**Figure 6**). This might offer clues into potentially  
600 targetable SMC mediated disease mechanisms. Additional studies are required to determine  
601 the exact molecular mechanisms by which *ZC3HC1* affects SMC proliferation, migration and  
602 neointima formation, by, for example, using SMC-lineage tracing mouse models and  
603 proteomic approaches. Our findings, however, provide strong evidence that lower *ZC3HC*  
604 gene expression in presence of the rs11556924-T allele or genetic manipulation in SMCs  
605 increased cell migration and, to some extent, enhanced their proliferation at later stages.  
606 Consequently, more proliferation of SMCs increases the risk of early lesion progression and  
607 neo-intima formation but may have an advantage in advance lesions by stabilizing the plaque.

608

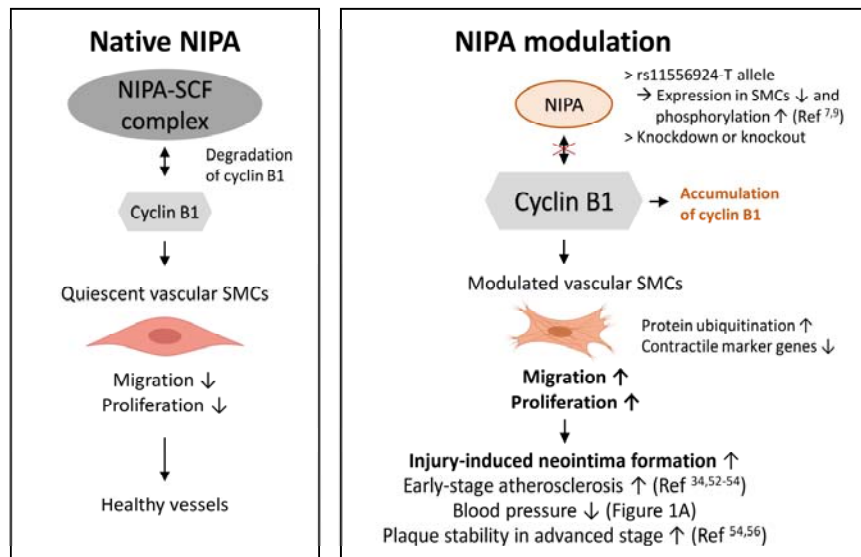

609

610 **Figure 6: Diagram illustrating the main findings of this study, that a deficiency in *ZC3HC1* increases**  
611 **vascular SMC migration, proliferation, and neointima formation following injury.** Under normal (healthy)  
612 conditions NIPA, an essential part of the SCF-type E3 ubiquitin ligase complex, activates the degradation of  
613 cyclin B1, which reduces SMC migration and proliferation (left). However, *ZC3HC1* modulation (right), by  
614 reducing the amount of NIPA or increasing NIPA phosphorylation<sup>7,9</sup>, is accompanied by cyclin B1 accumulation  
615 and increased SMC migration and proliferation. This in turn leads to injury-induced neointima formation and  
616 progression of early-stage atherosclerosis<sup>34,52-54</sup>. On the other hand, the rs11556924-T is associated with lower  
617 blood pressure (see **Figure 1A**) and increased SMC proliferation in the late stage of atherosclerosis may  
618 contribute to plaque stability<sup>54,56</sup>, resulting in an asymptomatic progression of this disease. Cell illustrations are  
619 from BioRender.  
620

#### 621 **Author contributions:**

622 Redouane Aherrahrou, Tobias Reinberger, Heribert Schunkert, Thorsten Kessler, Jeanette  
623 Erdmann and Zouhair Aherrahrou designed the project. Redouane Aherrahrou, Tobias  
624 Reinberger, Jeanette Erdmann and Zouhair Aherrahrou contributed to the text of the main  
625 manuscript. Redouane Aherrahrou, Tobias Reinberger, Jaafar Al-Hasani, Julia Werner,  
626 Miriam Otto, Sandra Wrobel, Maren Behrens, and Zouhair Aherrahrou performed the  
627 characterization experiments and generated data for most of the figures and tables. Maria  
628 Loreto Munoz-Venegas, Mete Civelek and Thorsten Kessler participated in data analysis and  
629 lookup. All authors contributed to the final article.

630

#### 631 **Sources of Funding:**

632 This work was supported by the German Federal Ministry of Education and Research  
633 (BMBF) in the context of the German Centre for Cardiovascular Research (FKZ  
634 81Z0700108, FKZ81X2700133); by Fondation Leducq (18CVD02, PlaqOmics); and by the  
635 Deutsche Forschungsgemeinschaft (DFG, German Research Foundation) under Germany`s



636 Excellence Strategy – EXC 22167-390884018 to HB and as part of the collaborative research  
637 centers SFB 1123 (B02, to T.K. and H.S.), TRR 267 (B06, to H.S.). This study was also  
638 supported by an American Heart Association Postdoctoral Fellowship (18POST33990046, to  
639 RA), National Institutes of Health grant (R21 HL135230, to MC), and by the German Federal  
640 Ministry of Education and Research (BMBF) in the context of the DZHK-Säule-B projects  
641 (FKZ 81X2700121). In addition, this work was supported by the Corona Foundation as part  
642 of the Junior Research Group Translational Cardiovascular Genomics (S199/10070/2017).

643

#### 644 **Acknowledgments:**

645 The authors thank Maren Behrens, Sandra Wrobel, and Lisa Paurat for technical support.  
646 We also thank the members of the Erdmann, Schunkert, and Civelek laboratories for feedback  
647 and discussions.

648

649 **Conflict of interest:** The authors declare that there is no conflict of interest.

650

#### 651 **References:**

652

- 653 1. Naghavi M, Abajobir AA, Abbafati C, Abbas KM, Abd-Allah F, Abera SF, Aboyans V, Adetokunboh O,  
654 Årnlöv J, Afshin A, Agrawal A, Kiadaliri AA, Ahmadi A, Ahmed MB, Aichour AN, Aichour I, Aichour  
655 MTE, Aiyar S, Al-Eyadhy A, Alahdab F, Al-Aly Z, Alam K, Alam N, Alam T, Alene KA, Ali SD,  
656 Alizadeh-Navaei R, Alkaabi JM, Alkerwi A, Alla F, et al. Global, regional, and national age-sex specific  
657 mortality for 264 causes of death, 1980-2016: A systematic analysis for the Global Burden of Disease  
658 Study 2016. *The Lancet* 2017;**390**:1151-1210.
- 659 2. Samani NJ, Erdmann J, Hall AS, Hengstenberg C, Mangino M, Mayer B, Dixon RJ, Meitinger T, Braund  
660 P, Wichmann H-E, Barrett JH, König IR, Stevens SE, Szymczak S, Tregouet D-A, Iles MM, Pahlke F,  
661 Pollard H, Lieb W, Cambien F, Fischer M, Ouwehand W, Blankenberg S, Balmforth AJ, Baessler A, Ball  
662 SG, Strom TM, Braenne I, Gieger C, Deloukas P, et al. Genomewide association analysis of coronary  
663 artery disease. *N Engl J Med* 2007;**357**:443–453.
- 664 3. Kathiresan S, Voight BF, Purcell S, Musunuru K, Ardissino D, Mannucci PM, Anand S, Engert JC,  
665 Samani NJ, Schunkert H, Erdmann J, Reilly MP, Rader DJ, Morgan T, Spertus JA, Stoll M, Girelli D,  
666 McKeown PP, Patterson CC, Siscovick DS, O'Donnell CJ, Elosua R, Peltonen L, Salomaa V, Schwartz  
667 SM, Melander O, Altshuler D, Merlini PA, Berzuini C, Bernardinelli L, et al. Genome-wide association of  
668 early-onset myocardial infarction with single nucleotide polymorphisms and copy number variants. *Nat*  
669 *Genet* 2009;**41**:334-341.
- 670 4. Schunkert H, König IR, Kathiresan S, Reilly MP, Assimes TL, Holm H, Preuss M, Stewart AFR, Barbalic  
671 M, Gieger C, Absher D, Aherrahrou Z, Allayee H, Altshuler D, Anand SS, Andersen K, Anderson JL,  
672 Ardissino D, Ball SG, Balmforth AJ, Barnes TA, Becker DM, Becker LC, Berger K, Bis JC, Boehholdt  
673 SM, Boerwinkle E, Braund PS, Brown MJ, Burnett MS, et al. Large-scale association analysis identifies  
674 13 new susceptibility loci for coronary artery disease. *Nat Genet* 2011;**43**:333-338.
- 675 5. Lu X, Wang LL, Chen S, He L, Yang X, Shi Y, Cheng J, Zhang L, Gu CC, Huang J, Wu T, Ma Y, Li J,  
676 Cao J, Chen JJJ, Ge D, Fan Z, Li YYY, Zhao L, Li H, Zhou X, Chen L, Liu DD, Chen JJJ, Duan X, Hao



- 677 Y, Wang LL, Lu F, Liu Z, Yao C, et al. Genome-wide association study in Han Chinese identifies four  
678 new susceptibility loci for coronary artery disease. *Nat Genet* 2012;**44**:890–894.
- 679 6. Nikpay M, Goel A, Won H-H, Hall LM, Willenborg C, Kanoni S, Saleheen D, Kyriakou T, Nelson CP,  
680 Hopewell JC, Webb TR, Zeng L, Dehghan A, Alver M, Armasu SM, Auro K, Bjornnes A, Chasman DI,  
681 Chen S, Ford I, Franceschini N, Gieger C, Grace C, Gustafsson S, Huang J, Hwang S-J, Kim YK, Kleber  
682 ME, Lau KW, Lu X, et al. A comprehensive 1000 Genomes–based genome-wide association meta-  
683 analysis of coronary artery disease. *Nat Genet* Nature Publishing Group; 2015;**47**:1121–1130.
- 684 7. Jones PD, Kaiser MA, Najafabadi MG, McVey DG, Beveridge AJ, Schofield CL, Samani NJ, Webb TR.  
685 The Coronary Artery Disease-associated Coding Variant in Zinc Finger C3HC-type Containing 1  
686 (ZC3HC1) Affects Cell Cycle Regulation \*. *J Biol Chem* Elsevier; 2016;**291**:16318–16327.
- 687 8. Ishigaki K, Akiyama M, Kanai M, Takahashi A, Kawakami E, Sugishita H, Sakaue S, Matoba N, Low S-  
688 K, Okada Y, Terao C, Amariuta T, Gazal S, Kochi Y, Horikoshi M, Suzuki K, Ito K, Koyama S, Ozaki K,  
689 Niida S, Sakata Y, Sakata Y, Kohno T, Shiraishi K, Momozawa Y, Hirata M, Matsuda K, Ikeda M, Iwata  
690 N, Ikegawa S, et al. Large-scale genome-wide association study in a Japanese population identifies novel  
691 susceptibility loci across different diseases. *Nat Genet* 2020;**52**:669–679.
- 692 9. Linseman T, Soubeyrand S, Martinuk A, Nikpay M, Lau P, McPherson R. Functional Validation of a  
693 Common Nonsynonymous Coding Variant in ZC3HC1 Associated With Protection From Coronary Artery  
694 Disease. *Circ Cardiovasc Genet* 2017;**10**:e001498.
- 695 10. Harst P van der, Verweij N. Identification of 64 Novel Genetic Loci Provides an Expanded View on the  
696 Genetic Architecture of Coronary Artery Disease. *Circ Res* 2018;**122**:433–443.
- 697 11. López-Mejías R, Genre F, García-Bermúdez M, Corrales A, González-Juanatey C, Llorca J, Miranda-  
698 Filloy JA, Rueda-Gotor J, Blanco R, Castañeda S, Martín J, González-Gay MA. The ZC3HC1 rs11556924  
699 polymorphism is associated with increased carotid intima-media thickness in patients with rheumatoid  
700 arthritis. *Arthritis Res Ther* 2013;**15**:R152.
- 701 12. Ouyang T, Bai R-Y, Bassermann F, Klitzing C von, Klumpen S, Miething C, Morris SW, Peschel C,  
702 Duyster J. Identification and Characterization of a Nuclear Interacting Partner of Anaplastic Lymphoma  
703 Kinase (NIPA) \*. *J Biol Chem* Elsevier; 2003;**278**:30028–30036.
- 704 13. Bassermann F, Klitzing C von, Münch S, Bai R-Y, Kawaguchi H, Morris SW, Peschel C, Duyster J. NIPA  
705 Defines an SCF-Type Mammalian E3 Ligase that Regulates Mitotic Entry. *Cell* 2005;**122**:45–57.
- 706 14. Smolock E, Berk BC. Chapter 98 - Vascular Smooth Muscle Cell Remodeling in Atherosclerosis and  
707 Restenosis. In: Hill JA, Olson EN, eds. *Muscle* Boston/Waltham: Academic Press; 2012. p. 1301–1309.
- 708 15. Moser J, Ark J van, Dijk MC van, Greiner DL, Shultz LD, Goor H van, Hillebrands J-L. Distinct  
709 Differences on Neointima Formation in Immunodeficient and Humanized Mice after Carotid or Femoral  
710 Arterial Injury. *Sci Rep* 2016;**6**:35387.
- 711 16. Aherrahrou R, Guo L, Nagraj VP, Aguhob A, Hinkle J, Chen L, Yuhl Soh J, Lue D, Alencar GF, Boltjes  
712 A, Laan SW van der, Farber E, Fuller D, Anane-Wae R, Akingbesote N, Manichaikul AW, Ma L,  
713 Kaikkonen MU, Björkegren JLM, Öngent-Gümüşçü S, Pasterkamp G, Miller CL, Owens GK, Finn A,  
714 Navab M, Fogelman AM, Berliner JA, Civelek M. Genetic Regulation of Atherosclerosis-Relevant  
715 Phenotypes in Human Vascular Smooth Muscle Cells. *Circ Res* 2020;**127**:1552–1565.
- 716 17. Dobin A, Davis CA, Schlesinger F, Drenkow J, Zaleski C, Jha S, Batut P, Chaisson M, Gingeras TR.  
717 STAR: ultrafast universal RNA-seq aligner. *Bioinforma Oxf Engl* 2013;**29**:15–21.
- 718 18. DeLuca DS, Levin JZ, Sivachenko A, Fennell T, Nazaire M-D, Williams C, Reich M, Winckler W, Getz  
719 G. RNA-SeQC: RNA-seq metrics for quality control and process optimization. *Bioinforma Oxf Engl*  
720 2012;**28**:1530–1532.
- 721 19. Liang Y, Aguet F, Barbeira AN, Ardlie K, Im HK. A scalable unified framework of total and allele-  
722 specific counts for cis-QTL, fine-mapping, and prediction. *Nat Commun* 2021;**12**:1424.

- 723 20. Song G, Lin D, Bao L, Jiang Q, Zhang Y, Zheng H, Gao Q. Effects of High Glucose on the Expression of  
724 LAMA1 and Biological Behavior of Choroid Retinal Endothelial Cells. *J Diabetes Res*  
725 2018;**2018**:7504614.
- 726 21. Livak KJ, Schmittgen TD. Analysis of relative gene expression data using real-time quantitative PCR and  
727 the 2(-Delta Delta C(T)) Method. *Methods San Diego Calif* 2001;**25**:402–408.
- 728 22. Aherrahrou Z, Doehring LC, Ehlers E-M, Liptau H, Depping R, Linsel-Nitschke P, Kaczmarek PM,  
729 Erdmann J, Schunkert H. An alternative splice variant in Abcc6, the gene causing dystrophic calcification,  
730 leads to protein deficiency in C3H/He mice. *J Biol Chem* 2008;**283**:7608–7615.
- 731 23. Love MI, Huber W, Anders S. Moderated estimation of fold change and dispersion for RNA-seq data  
732 with DESeq2. *Genome Biol* 2014;**15**:550.
- 733 24. Franceschini A, Szklarczyk D, Frankild S, Kuhn M, Simonovic M, Roth A, Lin J, Minguez P, Bork P,  
734 Mering C von, Jensen LJ. STRING v9.1: protein-protein interaction networks, with increased coverage  
735 and integration. *Nucleic Acids Res* 2013;**41**:D808–D815.
- 736 25. Kessler T, Zhang L, Liu Z, Yin X, Huang Y, Wang Y, Fu Y, Mayr M, Ge Q, Xu Q, Zhu Y, Wang X,  
737 Schmidt K, Wit C de, Erdmann J, Schunkert H, Aherrahrou Z, Kong W. ADAMTS-7 inhibits re-  
738 endothelialization of injured arteries and promotes vascular remodeling through cleavage of  
739 thrombospondin-1. *Circulation* 2015;**131**:1191–1201.
- 740 26. Hemani G, Zheng J, Elsworth B, Wade KH, Haberland V, Baird D, Laurin C, Burgess S, Bowden J,  
741 Langdon R, Tan VY, Yarmolinsky J, Shihab HA, Timpson NJ, Evans DM, Relton C, Martin RM, Davey  
742 Smith G, Gaunt TR, Haycock PC. The MR-Base platform supports systematic causal inference across the  
743 human phenome. *eLife* 2018;**7**:e34408.
- 744 27. Buniello A, MacArthur JAL, Cerezo M, Harris LW, Hayhurst J, Malangone C, McMahon A, Morales J,  
745 Mountjoy E, Sollis E, Suveges D, Vrousitou O, Whetzel PL, Amode R, Guillen JA, Riat HS, Trevanion  
746 SJ, Hall P, Junkins H, Flicek P, Burdett T, Hindorf LA, Cunningham F, Parkinson H. The NHGRI-EBI  
747 GWAS Catalog of published genome-wide association studies, targeted arrays and summary statistics  
748 2019. *Nucleic Acids Res* 2019;**47**:D1005–D1012.
- 749 28. Rotival M, Zeller T, Wild PS, Maouche S, Szymczak S, Schillert A, Castagné R, Deiseroth A, Proust C,  
750 Brocheton J, Godefroy T, Perret C, Germain M, Eleftheriadis M, Sinning CR, Schnabel RB, Lubos E,  
751 Lackner KJ, Rossmann H, Münzel T, Rendon A, Consortium C, Erdmann J, Deloukas P, Hengstenberg C,  
752 Diemert P, Montalescot G, Ouwehand WH, Samani NJ, Schunkert H, et al. Integrating Genome-Wide  
753 Genetic Variations and Monocyte Expression Data Reveals Trans-Regulated Gene Modules in Humans.  
754 Barsh GS, ed. *PLoS Genet* 2011;**7**:e1002367.
- 755 29. Erbilgin A, Civelek M, Romanoski CE, Pan C, Hagopian R, Berliner JA, Lusis AJ. Identification of CAD  
756 candidate genes in GWAS loci and their expression in vascular cells. *J Lipid Res* 2013;**54**:1894–1905.
- 757 30. Hajar R. Risk Factors for Coronary Artery Disease: Historical Perspectives. *Heart Views Off J Gulf Heart*  
758 *Assoc* 2017;**18**:109–114.
- 759 31. Khera AV, Kathiresan S. Genetics of coronary artery disease: Discovery, biology and clinical translation.  
760 2017;**18**:331-344.
- 761 32. Welt FGP, Rogers C. Inflammation and Restenosis in the Stent Era. *Arterioscler Thromb Vasc Biol*  
762 American Heart Association; 2002;**22**:1769–1776.
- 763 33. Kim MS, Dean LS. In-Stent Restenosis. *Cardiovasc Ther* 2011;**29**:190–198.
- 764 34. Grootaert MOJ, Bennett MR. Vascular smooth muscle cells in atherosclerosis: time for a re-assessment.  
765 *Cardiovasc Res* 2021;**0**:1–14.
- 766 35. Sorokin V, Vickneson K, Kofidis T, Woo CC, Lin XY, Foo R, Shanahan CM. Role of Vascular Smooth  
767 Muscle Cell Plasticity and Interactions in Vessel Wall Inflammation. *Front Immunol Frontiers*; 2020;**11**.

- 768 36. Goikuria H, Freijo M del M, Manrique RV, Sastre M, Elizagaray E, Lorenzo A, Vandenbroeck K, Alloza  
769 I. Characterization of Carotid Smooth Muscle Cells during Phenotypic Transition. *Cells* 2018;**7**.
- 770 37. Rensen SSM, Doevendans PAFM, Eys GJJM van. Regulation and characteristics of vascular smooth  
771 muscle cell phenotypic diversity. *Neth Heart J* 2007;**15**:100–108.
- 772 38. Alsaigh T, Evans D, Frankel D, Torkamani A. Decoding the transcriptome of atherosclerotic plaque at  
773 single-cell resolution. *bioRxiv* Cold Spring Harbor Laboratory; 2020;2020.03.03.968123.
- 774 39. Klitzing C von, Huss R, Illert AL, Fröschl A, Wötzel S, Peschel C, Bassermann F, Duyster J.  
775 APC/C(Cdh1)-mediated degradation of the F-box protein NIPA is regulated by its association with Skp1.  
776 *PLoS One* 2011;**6**:e28998.
- 777 40. Zhang Y-W, Brognard J, Coughlin C, You Z, Dolled-Filhart M, Aslanian A, Manning G, Abraham RT,  
778 Hunter T. The F box protein Fbx6 regulates Chk1 stability and cellular sensitivity to replication stress.  
779 *Mol Cell* 2009;**35**:442–453.
- 780 41. Willems AR, Schwab M, Tyers M. A hitchhiker’s guide to the cullin ubiquitin ligases: SCF and its kin.  
781 *Biochim Biophys Acta* 2004;**1695**:133–170.
- 782 42. Miano JM, Long X, Fujiwara K. Serum response factor: master regulator of the actin cytoskeleton and  
783 contractile apparatus. *Am J Physiol Cell Physiol* 2007;**292**:C70-81.
- 784 43. Rouillard AD, Gundersen GW, Fernandez NF, Wang Z, Monteiro CD, McDermott MG, Ma’ayan A. The  
785 harmonizome: a collection of processed datasets gathered to serve and mine knowledge about genes and  
786 proteins. *Database* 2016;**2016**.
- 787 44. Zhao W-M, Fang G. Anillin is a substrate of anaphase-promoting complex/cyclosome (APC/C) that  
788 controls spatial contractility of myosin during late cytokinesis. *J Biol Chem* 2005;**280**:33516–33524.
- 789 45. Straight AF, Field CM, Mitchison TJ. Anillin binds nonmuscle myosin II and regulates the contractile  
790 ring. *Mol Biol Cell* 2005;**16**:193–201.
- 791 46. Phosphorylation of Mcl-1 by CDK1–cyclin B1 initiates its Cdc20-dependent destruction during mitotic  
792 arrest. *EMBO J* John Wiley & Sons, Ltd; 2010;**29**:2407–2420.
- 793 47. Wan C, Borgeson B, Phanse S, Tu F, Drew K, Clark G, Xiong X, Kagan O, Kwan J, Bezginov A,  
794 Chessman K, Pal S, Cromar G, Papoulas O, Ni Z, Boutz DR, Stoilova S, Havugimana PC, Guo X, Maly  
795 RH, Sarov M, Greenblatt J, Babu M, Derry WB, Tillier ER, Wallingford JB, Parkinson J, Marcotte EM,  
796 Emili A. Panorama of ancient metazoan macromolecular complexes. *Nature* 2015;**525**:339–344.
- 797 48. Tominaga T, Sahai E, Chardin P, McCormick F, Courtneidge SA, Alberts AS. Diaphanous-related formins  
798 bridge Rho GTPase and Src tyrosine kinase signaling. *Mol Cell* 2000;**5**:13–25.
- 799 49. Baarlink C, Wang H, Grosse R. Nuclear actin network assembly by formins regulates the SRF coactivator  
800 MAL. *Science* 2013;**340**:864–867.
- 801 50. Braun-Dullaeus RC, Mann MJ, Seay U, Zhang L, Der Leyen HE von, Morris RE, Dzau VJ. Cell cycle  
802 protein expression in vascular smooth muscle cells in vitro and in vivo is regulated through  
803 phosphatidylinositol 3-kinase and mammalian target of rapamycin. *Arterioscler Thromb Vasc Biol*  
804 2001;**21**:1152–1158.
- 805 51. Morishita R, Gibbons GH, Kaneda Y, Ogihara T, Dzau VJ. Pharmacokinetics of antisense  
806 oligodeoxyribonucleotides (cyclin B1 and CDC 2 kinase) in the vessel wall in vivo: enhanced therapeutic  
807 utility for restenosis by HVJ-liposome delivery. *Gene* 1994;**149**:13–19.
- 808 52. Sandison ME, Dempster J, McCarron JG. The transition of smooth muscle cells from a contractile to a  
809 migratory, phagocytic phenotype: direct demonstration of phenotypic modulation. *J Physiol*  
810 2016;**594**:6189–6209.

- 811 53. Allahverdian S, Chaabane C, Boukais K, Francis GA, Bochaton-Piallat M-L. Smooth muscle cell fate and  
812 plasticity in atherosclerosis. *Cardiovasc Res* 2018;**114**:540–550.
- 813 54. Bennett MR, Sinha S, Owens GK. Vascular Smooth Muscle Cells in Atherosclerosis. *Circ Res* American  
814 Heart Association; 2016;**118**:692–702.
- 815 55. Andrés V, Castro C. Antiproliferative strategies for the treatment of vascular proliferative disease. *Curr*  
816 *Vasc Pharmacol* 2003;**1**:85–98.
- 817 56. O'Brien ER, Alpers CE, Stewart DK, Ferguson M, Tran N, Gordon D, Benditt EP, Hinohara T, Simpson  
818 JB, Schwartz SM. Proliferation in primary and restenotic coronary atherectomy tissue. Implications for  
819 antiproliferative therapy. *Circ Res* American Heart Association; 1993;**73**:223–231.
- 820
